# Supplementary material for: The Plasmodium NOT1-G Paralogue Acts as an Essential Nexus for Sexual Stage Maturation and Parasite Transmission
Source: bioRxiv or medRxiv preprint supplement (doi:10.1101/2021.05.25.445483), 2021-07-24

# Hart *et al.* Supplemental File 2 - Biological Replicate 1

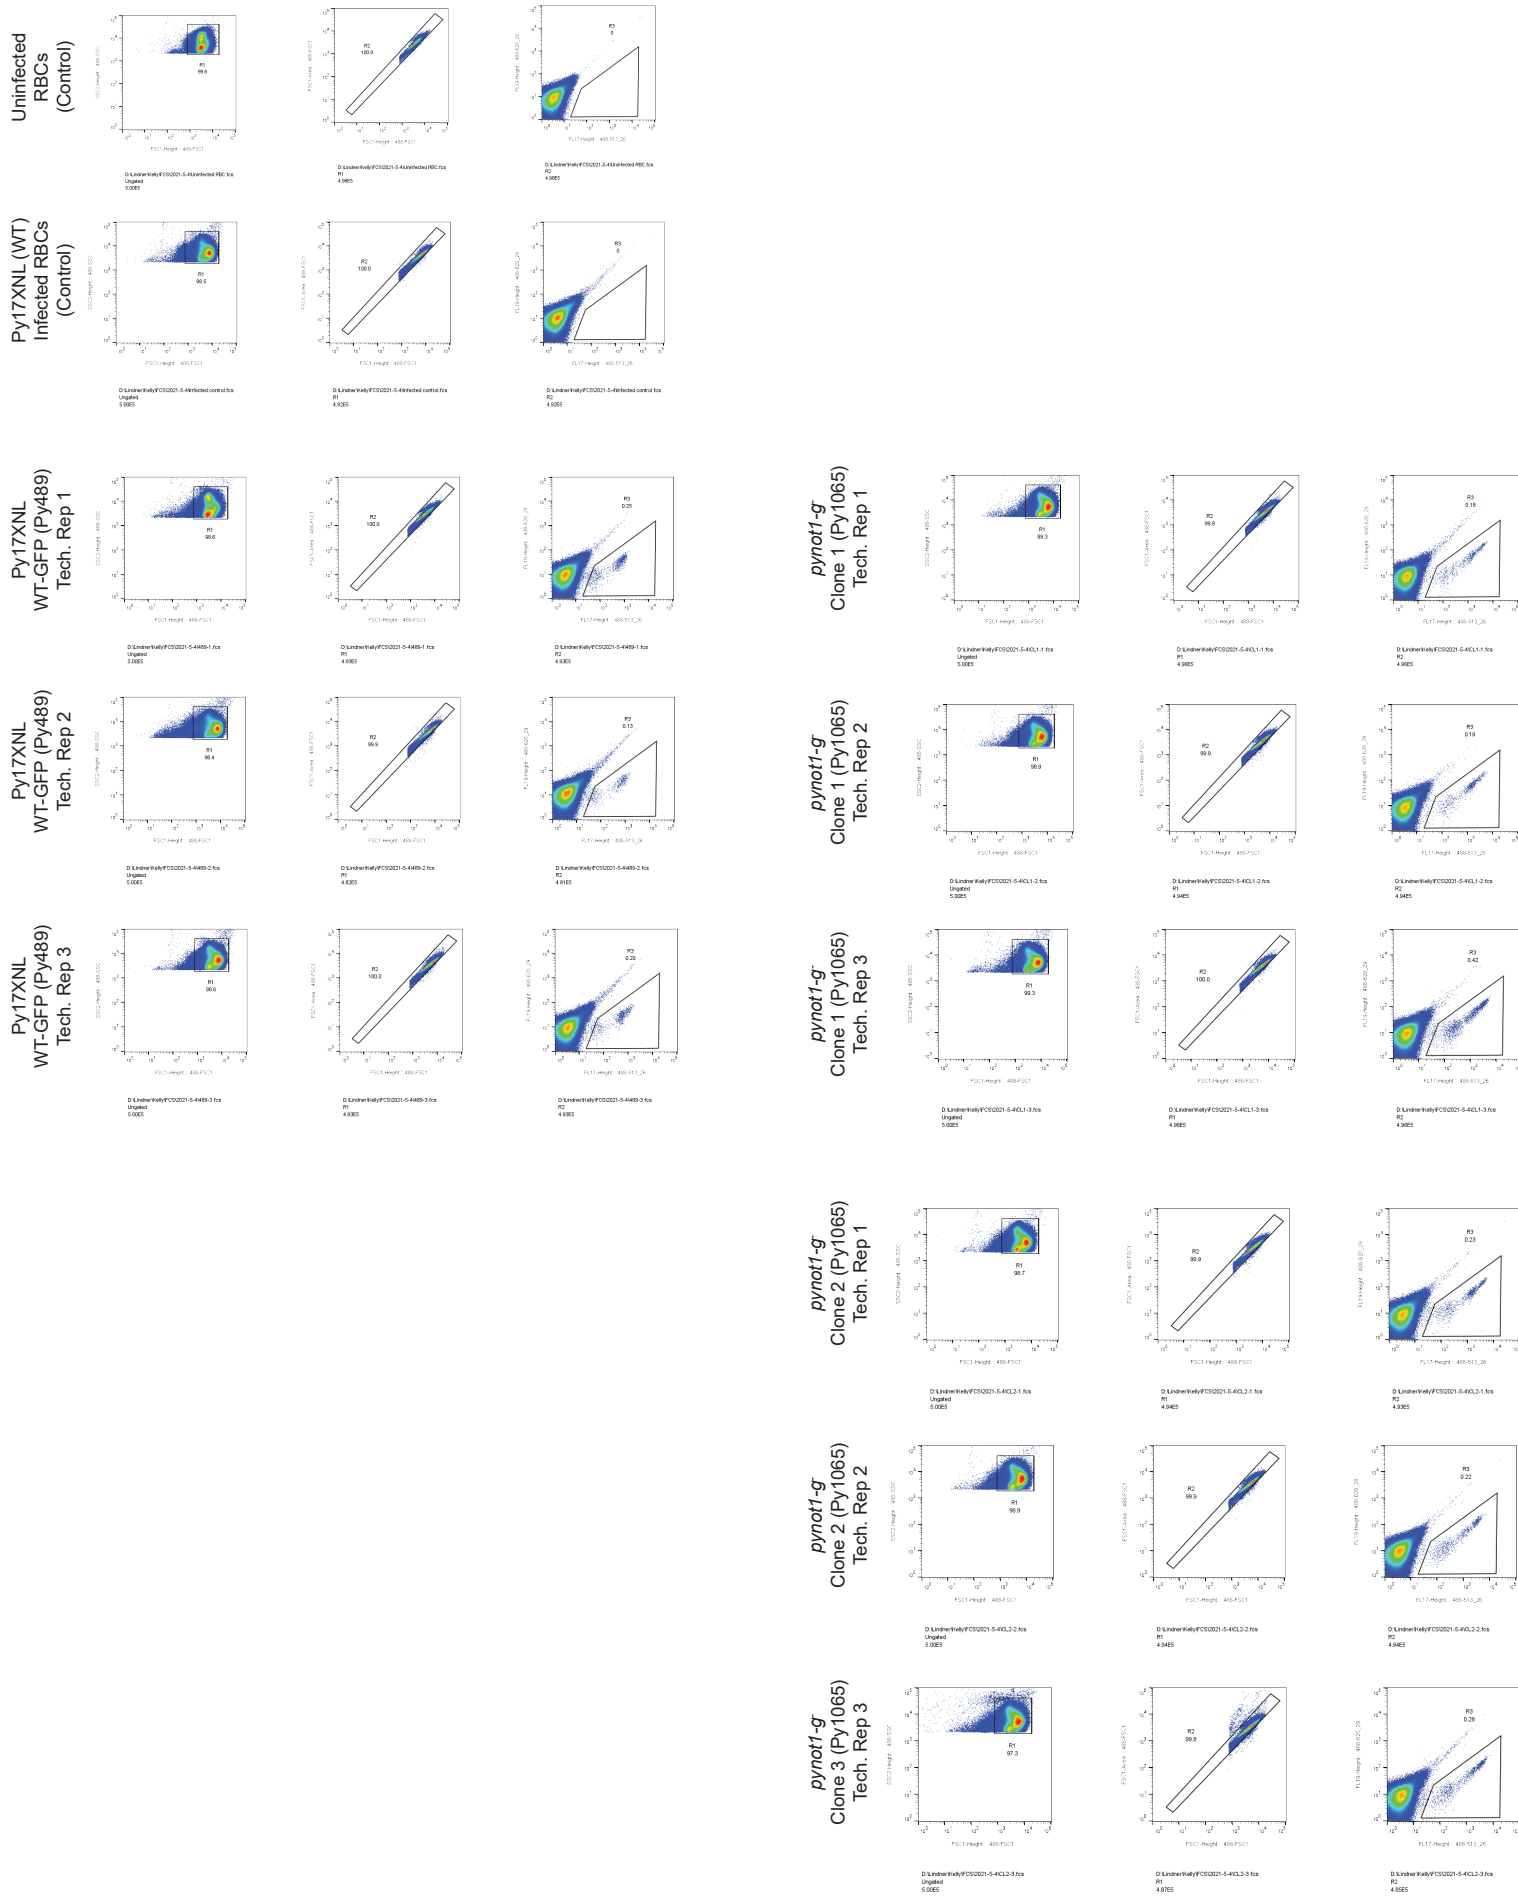

# Hart *et al.* Supplemental File 2 - Biological Replicate 2

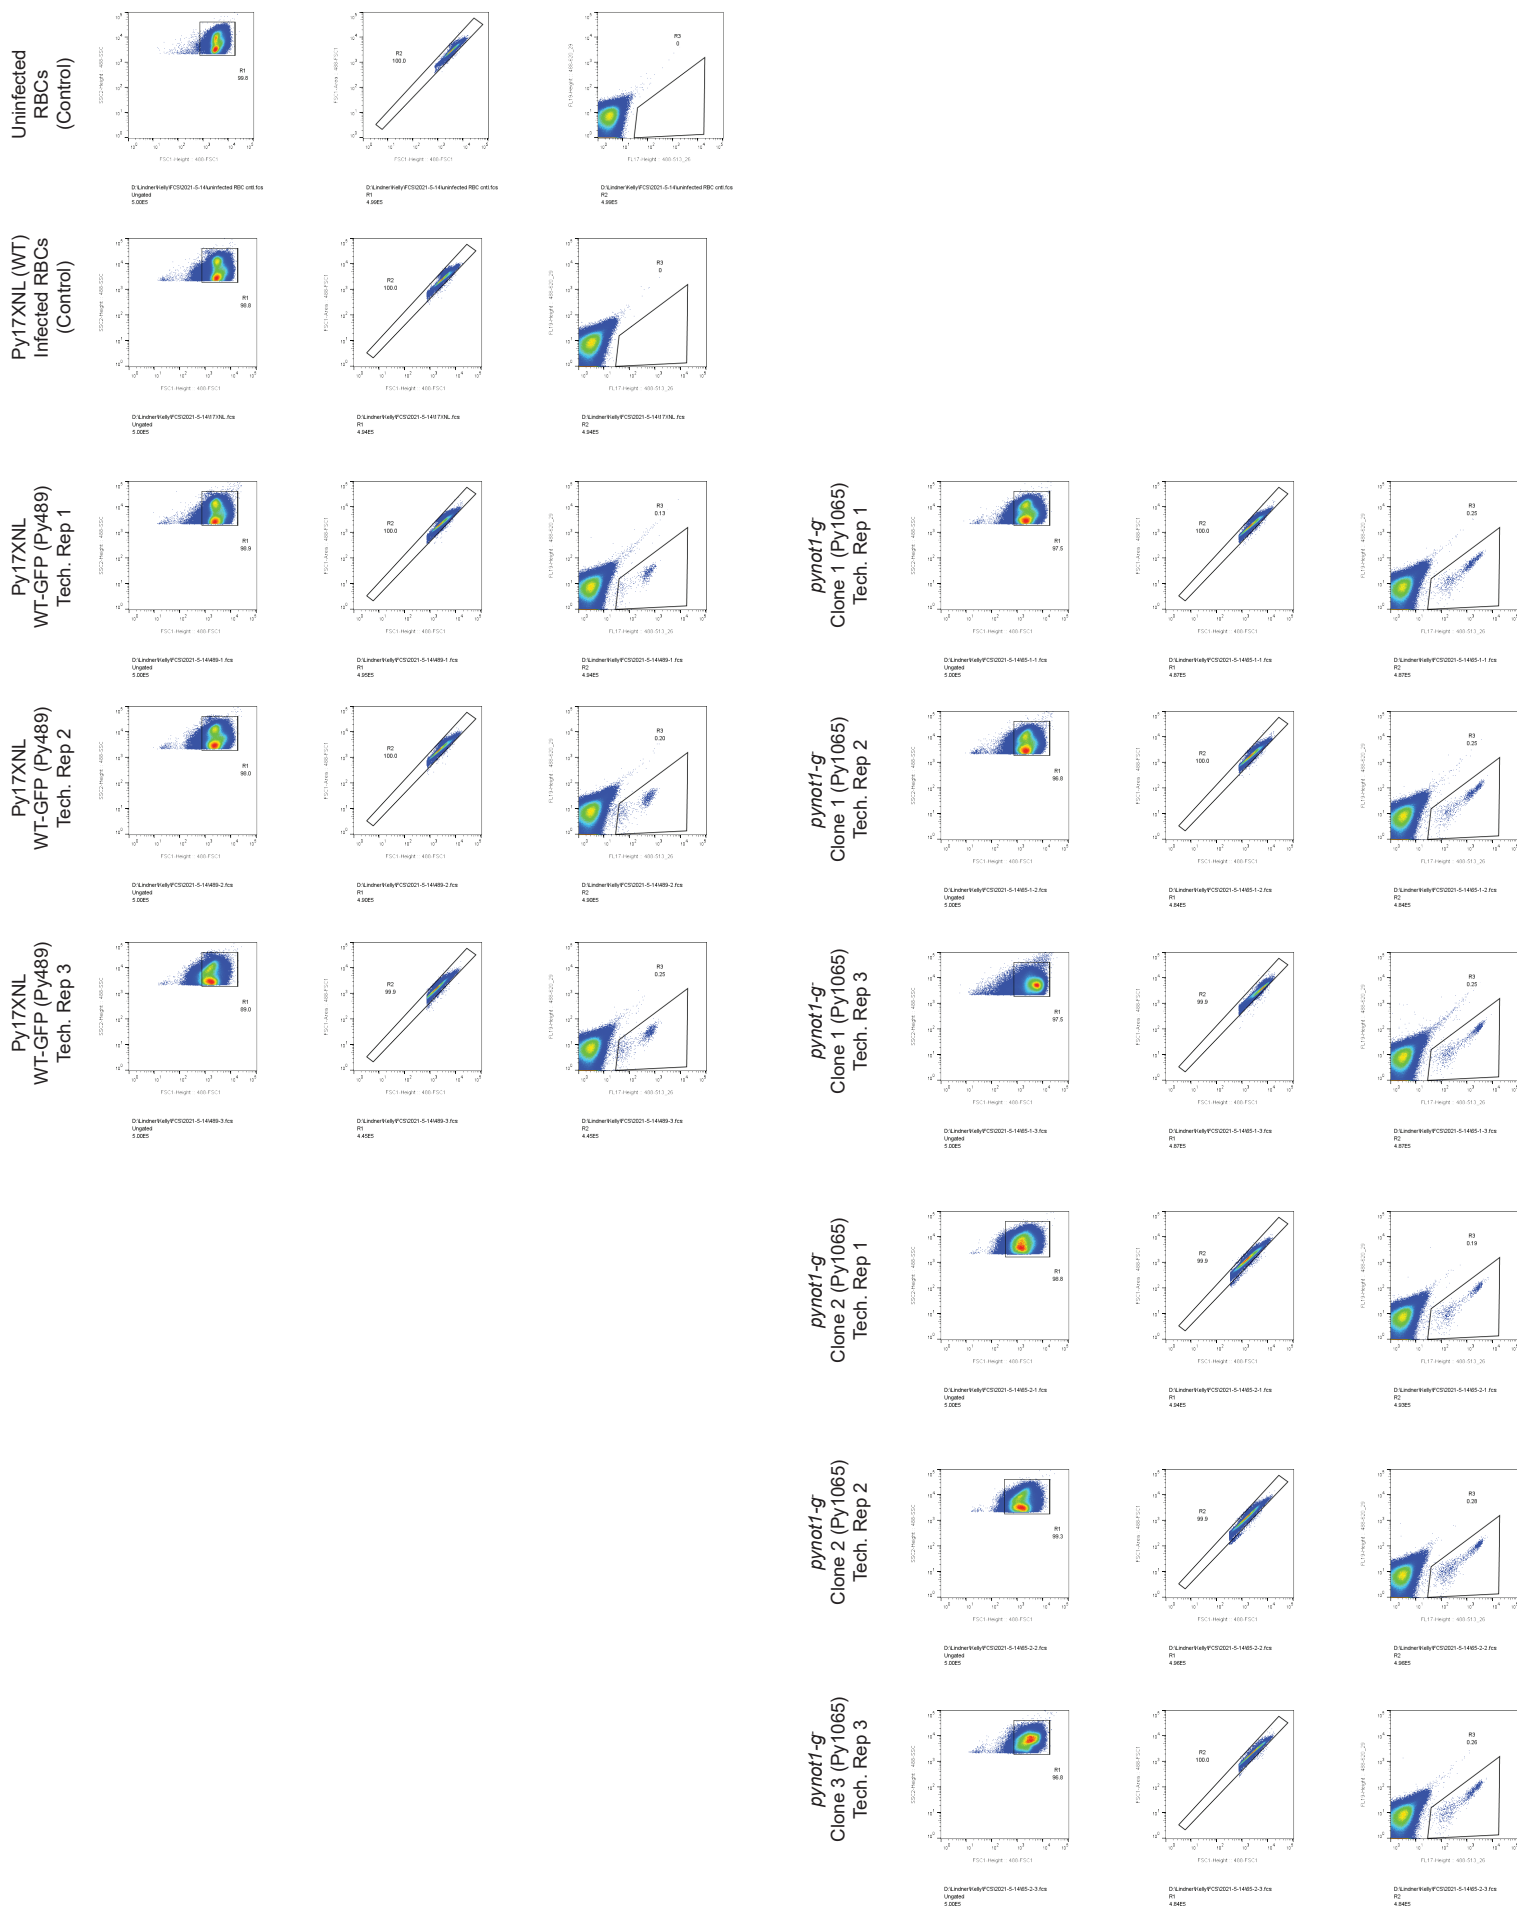

Supplement: Supplementary file [file media-3.pdf]
